# Supplementary material for: Effect of an external electric field, aqueous solution and specific adsorption on segregation of PtML/MML/Pt(111) (M = Cu, Pd, Au): a DFT study
Source: Royal Society of Chemistry journal article supplement (doi:10.1039/d0cp04223d), 2020-12-09
Supplement: d0cp04223d1.pdf [file d0cp04223d1.pdf]

## Supporting Information

### *Effect of External Electric Field, Aqueous Solution and Specific Adsorption on Segregation of Pt<sub>ML</sub>/M<sub>ML</sub>/Pt(111) (M=Cu, Pd, Au): A DFT Study*

*Xiaoming Zhang<sup>1,2</sup>, Huanqiao Li<sup>1,2</sup>, Zhangxun, Xia<sup>1,2</sup>, Shansheng Yu<sup>3</sup>, Suli Wang<sup>1,2\*</sup>, Gongquan Sun<sup>1,2\*</sup>*

*<sup>1</sup>Division of Fuel Cell & Battery, Dalian National Laboratory for Clean Energy, Dalian Institution of Chemical Physics, Chinese Academy of Sciences, Dalian 116023, China*

*<sup>2</sup>Key Laboratory of Fuel Cell & Hybrid Power Sources, Chinese Academy of Sciences, Dalian 116023, China*

*<sup>3</sup>Department of Materials Science, Jilin University, Changchun 130012, China*

**KEYWORDS:** *Pt<sub>ML</sub>/M<sub>ML</sub>/Pt(111), segregation, external electric field, aqueous solution, DFT*

*\*Corresponding author: Gongquan Sun, e-mail: [gqsun@dicp.ac.cn](mailto:gqsun@dicp.ac.cn) & Suli Wang, e-mail: [suliwang@dicp.ac.cn](mailto:suliwang@dicp.ac.cn)*

## Figures and Tables

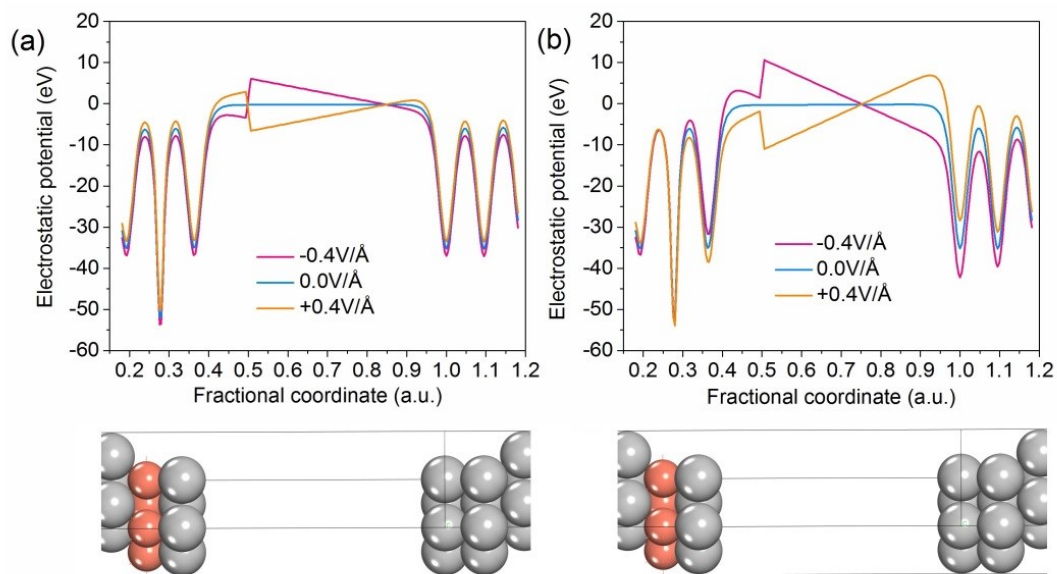

Figure S 1 The electrostatic potential of  $\text{Pt}_{\text{ML}}/\text{Cu}_{\text{ML}}/\text{Pt}(111)$  alloy under (a) vacuum and (b) aqueous solution condition. Gray: Pt; Brown: Cu

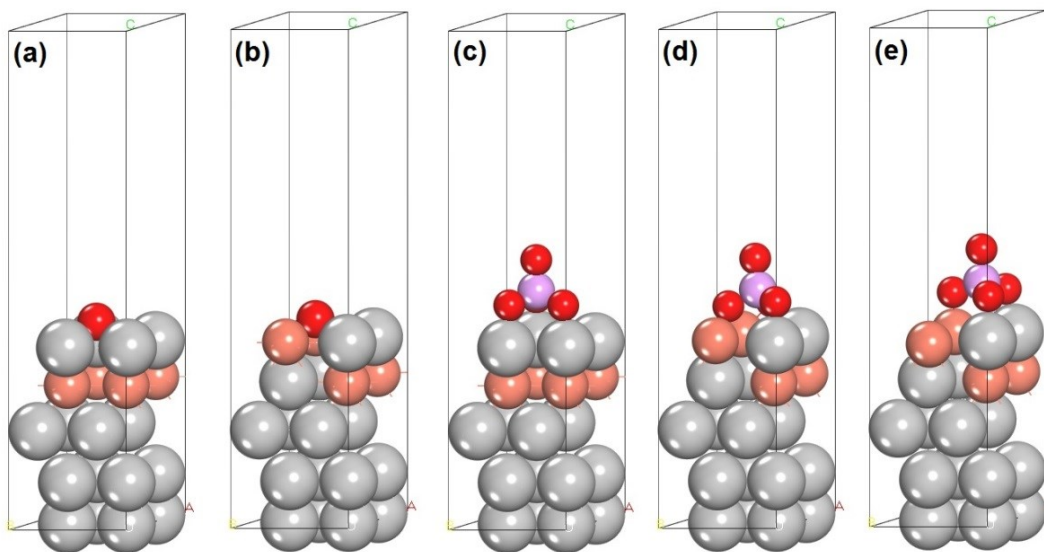

Figure S 2 Optimized structures of PtCu alloys under adsorption: (a)  $\text{Pt}_{\text{ML}}/\text{Cu}_{\text{ML}}/\text{Pt}(111)$  with O atom adsorption, (b)  $\text{Pt}_2\text{Cu}_2/\text{Pt}_2\text{Cu}_2/\text{Pt}(111)$  with O atom adsorption, (c)  $\text{Pt}_{\text{ML}}/\text{Cu}_{\text{ML}}/\text{Pt}(111)$  with  $\text{PO}_4^{3-}$  adsorption; (d)  $\text{Pt}_2\text{Cu}_2/\text{Pt}_2\text{Cu}_2/\text{Pt}(111)$  with  $\text{PO}_4^{3-}$  adsorption; (e)  $\text{Pt}_2\text{Cu}_2/\text{Pt}_2\text{Cu}_2/\text{Pt}(111)$  with  $\text{PO}_4^{3-}$  adsorption under aqueous solution and  $-0.4\text{V}/\text{\AA}$ . Gray: Pt; Brown: Cu

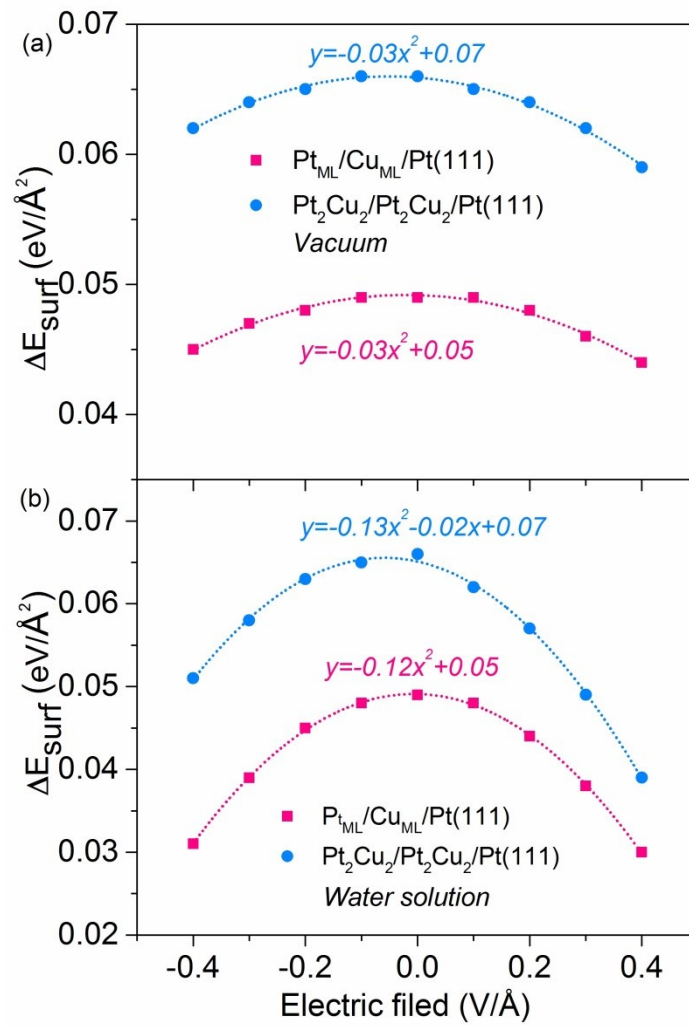

Figure S 3 The calculated surface energy of PtCu alloy, as a function of electric field, under vacuum and aqueous solution: (a) surface energy of  $\text{Pt}_{\text{ML}}/\text{Cu}_{\text{ML}}/\text{Pt}(111)$  and  $\text{Pt}_2\text{Cu}_2/\text{Pt}_2\text{Cu}_2/\text{Pt}(111)$  alloy under vacuum condition; (b) surface energy of  $\text{Pt}_{\text{ML}}/\text{Cu}_{\text{ML}}/\text{Pt}(111)$  and  $\text{Pt}_2\text{Cu}_2/\text{Pt}_2\text{Cu}_2/\text{Pt}(111)$  alloy with aqueous solution

Table S 1 Segregation energies (eV) for various Pt-M-Pt(111) alloys under vacuum conditions

|             | $\Delta E_{seg}(1)$ | $\Delta E_{seg}(2)$ | $\Delta E_{seg}(3)$ | $\Delta E_{seg}(4)$ |
|-------------|---------------------|---------------------|---------------------|---------------------|
| <i>PtCu</i> | 0.51                | 0.89                | 1.33                | 1.81                |
| <i>PtPd</i> | 0.08                | 0.18                | 0.22                | 0.26                |
| <i>PtAu</i> | -0.14               | -0.36               | -0.78               | -1.24               |

Table S 2 The interlayer distance ( $d_i$ , the distance between the first layer and the second layer;  $d_{ii}$ , the distance between the second layer and the third layer) of PtM alloys under electric field with or without aqueous solution

(a)  $Pt_{ML}/Cu_{ML}/Pt(111)$  and  $Pt_2Cu_2/Pt_2Cu_2/Pt(111)$  with or without aqueous solution

| Electric field(V/Å) | Vacuum           |          |                                 |          | Aqueous solution |          |                                 |          |
|---------------------|------------------|----------|---------------------------------|----------|------------------|----------|---------------------------------|----------|
|                     | Pt <sub>ML</sub> |          | Pt <sub>2</sub> Cu <sub>2</sub> |          | Pt <sub>ML</sub> |          | Pt <sub>2</sub> Cu <sub>2</sub> |          |
|                     | $d_i$            | $d_{ii}$ | $d_i$                           | $d_{ii}$ | $d_i$            | $d_{ii}$ | $d_i$                           | $d_{ii}$ |
| <b>-0.4</b>         | 2.08             | 2.08     | 2.09                            | 2.22     | 2.09             | 2.09     | 2.10                            | 2.23     |
| <b>-0.3</b>         | 2.08             | 2.08     | 2.09                            | 2.22     | 2.09             | 2.08     | 2.10                            | 2.22     |
| <b>-0.2</b>         | 2.08             | 2.08     | 2.08                            | 2.22     | 2.08             | 2.08     | 2.09                            | 2.22     |
| <b>-0.1</b>         | 2.08             | 2.08     | 2.08                            | 2.22     | 2.08             | 2.08     | 2.08                            | 2.22     |
| <b>0.0</b>          | 2.08             | 2.08     | 2.08                            | 2.22     | 2.08             | 2.08     | 2.08                            | 2.22     |
| <b>0.1</b>          | 2.08             | 2.08     | 2.08                            | 2.22     | 2.08             | 2.08     | 2.08                            | 2.22     |
| <b>0.2</b>          | 2.08             | 2.08     | 2.08                            | 2.22     | 2.08             | 2.08     | 2.08                            | 2.22     |
| <b>0.3</b>          | 2.08             | 2.08     | 2.08                            | 2.22     | 2.08             | 2.08     | 2.08                            | 2.22     |
| <b>0.4</b>          | 2.08             | 2.08     | 2.08                            | 2.22     | 2.07             | 2.09     | 2.08                            | 2.22     |

(b) O atom adsorbed  $Pt_2Cu_2/Pt_2Cu_2/Pt(111)$  and  $Pt_{ML}/Cu_{ML}/Pt(111)$  with and without aqueous solution

| Electric field(V/Å) | Vacuum           |          |                                 |          | Aqueous solution |          |                                 |          |
|---------------------|------------------|----------|---------------------------------|----------|------------------|----------|---------------------------------|----------|
|                     | Pt <sub>ML</sub> |          | Pt <sub>2</sub> Cu <sub>2</sub> |          | Pt <sub>ML</sub> |          | Pt <sub>2</sub> Cu <sub>2</sub> |          |
|                     | $d_i$            | $d_{ii}$ | $d_i$                           | $d_{ii}$ | $d_i$            | $d_{ii}$ | $d_i$                           | $d_{ii}$ |
| <b>-0.4</b>         | 2.10             | 2.08     | 2.09                            | 2.23     | 2.11             | 2.09     | 2.09                            | 2.24     |
| <b>-0.3</b>         | 2.10             | 2.08     | 2.09                            | 2.23     | 2.10             | 2.08     | 2.09                            | 2.24     |
| <b>-0.2</b>         | 2.10             | 2.08     | 2.09                            | 2.23     | 2.10             | 2.08     | 2.09                            | 2.23     |
| <b>-0.1</b>         | 2.10             | 2.08     | 2.09                            | 2.23     | 2.10             | 2.08     | 2.09                            | 2.23     |
| <b>0.0</b>          | 2.10             | 2.08     | 2.09                            | 2.23     | 2.10             | 2.08     | 2.09                            | 2.23     |
| <b>0.1</b>          | 2.10             | 2.08     | 2.09                            | 2.23     | 2.10             | 2.08     | 2.09                            | 2.23     |
| <b>0.2</b>          | 2.10             | 2.08     | 2.09                            | 2.23     | 2.10             | 2.08     | 2.09                            | 2.23     |
| <b>0.3</b>          | 2.10             | 2.08     | 2.09                            | 2.23     | 2.10             | 2.08     | 2.09                            | 2.23     |
| <b>0.4</b>          | 2.10             | 2.08     | 2.09                            | 2.23     | 2.10             | 2.08     | 2.09                            | 2.23     |

(c)  $PO_4^{3-*}$  adsorbed  $Pt_2Cu_2/Pt_2Cu_2/Pt(111)$  and  $Pt_{ML}/Cu_{ML}/Pt(111)$  with and without aqueous solution

| Electric field(V/Å) | Vacuum           |          |                                 |          | Aqueous solution |          |                                 |          |
|---------------------|------------------|----------|---------------------------------|----------|------------------|----------|---------------------------------|----------|
|                     | Pt <sub>ML</sub> |          | Pt <sub>2</sub> Cu <sub>2</sub> |          | Pt <sub>ML</sub> |          | Pt <sub>2</sub> Cu <sub>2</sub> |          |
|                     | $d_i$            | $d_{ii}$ | $d_i$                           | $d_{ii}$ | $d_i$            | $d_{ii}$ | $d_i$                           | $d_{ii}$ |

|             |      |      |      |      |      |      |      |      |
|-------------|------|------|------|------|------|------|------|------|
| <b>-0.4</b> | 2.08 | 2.07 | 2.09 | 2.22 | 2.08 | 2.08 | 2.11 | 2.23 |
| <b>-0.3</b> | 2.08 | 2.07 | 2.07 | 2.23 | 2.08 | 2.07 | 2.09 | 2.23 |
| <b>-0.2</b> | 2.08 | 2.07 | 2.06 | 2.23 | 2.08 | 2.07 | 2.07 | 2.23 |
| <b>-0.1</b> | 2.08 | 2.07 | 2.06 | 2.23 | 2.08 | 2.07 | 2.06 | 2.23 |
| <b>0.0</b>  | 2.08 | 2.07 | 2.06 | 2.23 | 2.08 | 2.07 | 2.06 | 2.23 |
| <b>0.1</b>  | 2.08 | 2.07 | 2.06 | 2.23 | 2.08 | 2.07 | 2.06 | 2.23 |
| <b>0.2</b>  | 2.08 | 2.07 | 2.06 | 2.23 | 2.08 | 2.07 | 2.06 | 2.23 |
| <b>0.3</b>  | 2.08 | 2.07 | 2.06 | 2.23 | 2.08 | 2.07 | 2.06 | 2.23 |
| <b>0.4</b>  | 2.08 | 2.07 | 2.07 | 2.23 | 2.08 | 2.07 | 2.06 | 2.23 |

(d) Pt<sub>ML</sub>/Pd<sub>ML</sub>/Pt(111) and Pt<sub>2</sub>Pd<sub>2</sub>/Pt<sub>2</sub>Pd<sub>2</sub>/Pt(111) with or without aqueous solution

| Electric field(V/Å) | Vacuum           |                 |                                 |                 | Aqueous solution |                 |                                 |                 |
|---------------------|------------------|-----------------|---------------------------------|-----------------|------------------|-----------------|---------------------------------|-----------------|
|                     | Pt <sub>ML</sub> |                 | Pt <sub>2</sub> Pd <sub>2</sub> |                 | Pt <sub>ML</sub> |                 | Pt <sub>2</sub> Pd <sub>2</sub> |                 |
|                     | d <sub>I</sub>   | d <sub>II</sub> | d <sub>I</sub>                  | d <sub>II</sub> | d <sub>I</sub>   | d <sub>II</sub> | d <sub>I</sub>                  | d <sub>II</sub> |
| <b>-0.4</b>         | 2.30             | 2.28            | 2.29                            | 2.29            | 2.31             | 2.29            | 2.30                            | 2.29            |
| <b>-0.3</b>         | 2.30             | 2.28            | 2.29                            | 2.28            | 2.31             | 2.28            | 2.30                            | 2.29            |
| <b>-0.2</b>         | 2.30             | 2.28            | 2.29                            | 2.28            | 2.30             | 2.28            | 2.29                            | 2.29            |
| <b>-0.1</b>         | 2.30             | 2.28            | 2.29                            | 2.28            | 2.30             | 2.28            | 2.29                            | 2.28            |
| <b>0.0</b>          | 2.30             | 2.28            | 2.29                            | 2.28            | 2.30             | 2.28            | 2.28                            | 2.28            |
| <b>0.1</b>          | 2.30             | 2.28            | 2.29                            | 2.28            | 2.30             | 2.28            | 2.28                            | 2.29            |
| <b>0.2</b>          | 2.30             | 2.28            | 2.29                            | 2.28            | 2.30             | 2.28            | 2.28                            | 2.29            |
| <b>0.3</b>          | 2.30             | 2.28            | 2.28                            | 2.28            | 2.30             | 2.28            | 2.27                            | 2.29            |
| <b>0.4</b>          | 2.30             | 2.28            | 2.28                            | 2.29            | 2.30             | 2.28            | 2.27                            | 2.29            |

(e) Pt<sub>ML</sub>/Au<sub>ML</sub>/Pt(111) and Pt<sub>2</sub>Au<sub>2</sub>/Pt<sub>2</sub>Au<sub>2</sub>/Pt(111) with or without aqueous solution

| Electric field(V/Å) | Vacuum           |                 |                                 |                 | Aqueous solution |                 |                                 |                 |
|---------------------|------------------|-----------------|---------------------------------|-----------------|------------------|-----------------|---------------------------------|-----------------|
|                     | Pt <sub>ML</sub> |                 | Pt <sub>2</sub> Au <sub>2</sub> |                 | Pt <sub>ML</sub> |                 | Pt <sub>2</sub> Au <sub>2</sub> |                 |
|                     | d <sub>I</sub>   | d <sub>II</sub> | d <sub>I</sub>                  | d <sub>II</sub> | d <sub>I</sub>   | d <sub>II</sub> | d <sub>I</sub>                  | d <sub>II</sub> |
| <b>-0.4</b>         | 2.45             | 2.44            | 2.49                            | 2.37            | 2.46             | 2.44            | 2.51                            | 2.38            |
| <b>-0.3</b>         | 2.45             | 2.44            | 2.49                            | 2.37            | 2.45             | 2.44            | 2.50                            | 2.38            |
| <b>-0.2</b>         | 2.45             | 2.44            | 2.49                            | 2.37            | 2.45             | 2.44            | 2.49                            | 2.37            |
| <b>-0.1</b>         | 2.45             | 2.44            | 2.49                            | 2.37            | 2.45             | 2.44            | 2.49                            | 2.37            |
| <b>0.0</b>          | 2.45             | 2.44            | 2.49                            | 2.37            | 2.45             | 2.44            | 2.49                            | 2.37            |
| <b>0.1</b>          | 2.45             | 2.44            | 2.49                            | 2.37            | 2.45             | 2.44            | 2.49                            | 2.37            |
| <b>0.2</b>          | 2.45             | 2.44            | 2.49                            | 2.37            | 2.43             | 2.44            | 2.49                            | 2.37            |
| <b>0.3</b>          | 2.45             | 2.44            | 2.49                            | 2.37            | 2.43             | 2.43            | 2.49                            | 2.38            |
| <b>0.4</b>          | 2.45             | 2.44            | 2.49                            | 2.37            | 2.43             | 2.44            | 2.53                            | 2.38            |

(f) Cu<sub>ML</sub>/Pt(111), Pd<sub>ML</sub>/Pt(111) and Au<sub>ML</sub>/Pt(111) without aqueous solution

| Electric field(V/Å) | Vacuum                    |                 |                           |                 |                           |                 |
|---------------------|---------------------------|-----------------|---------------------------|-----------------|---------------------------|-----------------|
|                     | Cu <sub>ML</sub> /Pt(111) |                 | Pd <sub>ML</sub> /Pt(111) |                 | Au <sub>ML</sub> /Pt(111) |                 |
|                     | d <sub>I</sub>            | d <sub>II</sub> | d <sub>I</sub>            | d <sub>II</sub> | d <sub>I</sub>            | d <sub>II</sub> |
| <b>-0.4</b>         | 2.06                      | 2.35            | 2.30                      | 2.32            | 2.49                      | 2.34            |

|             |      |      |      |      |      |      |
|-------------|------|------|------|------|------|------|
| <b>-0.3</b> | 2.06 | 2.35 | 2.30 | 2.32 | 2.49 | 2.34 |
| <b>-0.2</b> | 2.06 | 2.35 | 2.30 | 2.32 | 2.49 | 2.34 |
| <b>-0.1</b> | 2.06 | 2.35 | 2.30 | 2.32 | 2.49 | 2.34 |
| <b>0.0</b>  | 2.06 | 2.35 | 2.30 | 2.32 | 2.49 | 2.34 |
| <b>0.1</b>  | 2.06 | 2.35 | 2.30 | 2.32 | 2.49 | 2.34 |
| <b>0.2</b>  | 2.06 | 2.35 | 2.30 | 2.32 | 2.49 | 2.34 |
| <b>0.3</b>  | 2.06 | 2.35 | 2.30 | 2.32 | 2.49 | 2.34 |
| <b>0.4</b>  | 2.06 | 2.35 | 2.30 | 2.32 | 2.49 | 2.34 |

(g)  $\text{Cu}_{\text{ML}}/\text{Pt}(111)$ ,  $\text{Pd}_{\text{ML}}/\text{Pt}(111)$  and  $\text{Au}_{\text{ML}}/\text{Pt}(111)$  with aqueous solution

| Electric field(V/Å) | Aqueous solution                       |                 |                                        |                 |                                        |                 |
|---------------------|----------------------------------------|-----------------|----------------------------------------|-----------------|----------------------------------------|-----------------|
|                     | $\text{Cu}_{\text{ML}}/\text{Pt}(111)$ |                 | $\text{Pd}_{\text{ML}}/\text{Pt}(111)$ |                 | $\text{Au}_{\text{ML}}/\text{Pt}(111)$ |                 |
|                     | $d_{\text{I}}$                         | $d_{\text{II}}$ | $d_{\text{I}}$                         | $d_{\text{II}}$ | $d_{\text{I}}$                         | $d_{\text{II}}$ |
| <b>-0.4</b>         | 2.08                                   | 2.36            | 2.30                                   | 2.33            | 2.49                                   | 2.34            |
| <b>-0.3</b>         | 2.06                                   | 2.35            | 2.30                                   | 2.32            | 2.49                                   | 2.34            |
| <b>-0.2</b>         | 2.06                                   | 2.35            | 2.30                                   | 2.32            | 2.49                                   | 2.34            |
| <b>-0.1</b>         | 2.06                                   | 2.35            | 2.30                                   | 2.32            | 2.49                                   | 2.34            |
| <b>0.0</b>          | 2.06                                   | 2.35            | 2.30                                   | 2.32            | 2.49                                   | 2.34            |
| <b>0.1</b>          | 2.06                                   | 2.35            | 2.30                                   | 2.32            | 2.47                                   | 2.33            |
| <b>0.2</b>          | 2.06                                   | 2.35            | 2.30                                   | 2.32            | 2.47                                   | 2.33            |
| <b>0.3</b>          | 2.06                                   | 2.36            | 2.29                                   | 2.32            | 2.47                                   | 2.33            |
| <b>0.4</b>          | 2.07                                   | 2.36            | 2.29                                   | 2.33            | 2.47                                   | 2.34            |

Table S 3 The segregation energy (eV) of PM alloy under electric field with or without aqueous solution effect

(a)  $\text{Pt}_2\text{Cu}_2/\text{Pt}_2\text{Cu}_2/\text{Pt}(111)$ ,  $\text{Pt}_2\text{Pd}_2/\text{Pt}_2\text{Pd}_2/\text{Pt}(111)$  and  $\text{Pt}_2\text{Au}_2/\text{Pt}_2\text{Au}_2/\text{Pt}(111)$  alloy with and without aqueous solution

| Electric field(V/Å) | Vacuum                   |                          |                          | Aqueous solution         |                          |                          |
|---------------------|--------------------------|--------------------------|--------------------------|--------------------------|--------------------------|--------------------------|
|                     | $\text{Pt}_2\text{Cu}_2$ | $\text{Pt}_2\text{Pd}_2$ | $\text{Pt}_2\text{Au}_2$ | $\text{Pt}_2\text{Cu}_2$ | $\text{Pt}_2\text{Pd}_2$ | $\text{Pt}_2\text{Au}_2$ |
| <b>-0.4</b>         | 0.96                     | 0.22                     | -0.31                    | 1.10                     | 0.28                     | -0.17                    |
| <b>-0.3</b>         | 0.95                     | 0.21                     | -0.33                    | 1.06                     | 0.26                     | -0.22                    |
| <b>-0.2</b>         | 0.93                     | 0.20                     | -0.34                    | 1.01                     | 0.24                     | -0.27                    |
| <b>-0.1</b>         | 0.91                     | 0.19                     | -0.35                    | 0.94                     | 0.22                     | -0.32                    |
| <b>0</b>            | 0.89                     | 0.18                     | -0.36                    | 0.89                     | 0.18                     | -0.36                    |
| <b>0.1</b>          | 0.87                     | 0.17                     | -0.37                    | 0.78                     | 0.13                     | -0.41                    |
| <b>0.2</b>          | 0.85                     | 0.16                     | -0.38                    | 0.69                     | 0.08                     | -0.44                    |
| <b>0.3</b>          | 0.83                     | 0.15                     | -0.40                    | 0.59                     | 0.03                     | -0.49                    |
| <b>0.4</b>          | 0.81                     | 0.14                     | -0.41                    | 0.49                     | -0.02                    | -0.53                    |

(b)  $\text{Cu}_{\text{ML}}/\text{Pt}(111)$ ,  $\text{Pd}_{\text{ML}}/\text{Pt}(111)$  and  $\text{Au}_{\text{ML}}/\text{Pt}(111)$  alloy with and without aqueous solution

| Electric field(V/Å) | Vacuum                  |                         |                         | Aqueous solution        |                         |                         |
|---------------------|-------------------------|-------------------------|-------------------------|-------------------------|-------------------------|-------------------------|
|                     | $\text{Cu}_{\text{ML}}$ | $\text{Pd}_{\text{ML}}$ | $\text{Au}_{\text{ML}}$ | $\text{Cu}_{\text{ML}}$ | $\text{Pd}_{\text{ML}}$ | $\text{Au}_{\text{ML}}$ |

|             |      |      |       |      |       |       |
|-------------|------|------|-------|------|-------|-------|
| <b>-0.4</b> | 1.93 | 0.34 | -1.17 | 2.20 | 0.48  | -0.95 |
| <b>-0.3</b> | 1.91 | 0.32 | -1.19 | 2.12 | 0.45  | -1.03 |
| <b>-0.2</b> | 1.87 | 0.30 | -1.20 | 2.01 | 0.40  | -1.10 |
| <b>-0.1</b> | 1.84 | 0.28 | -1.22 | 1.88 | 0.33  | -1.17 |
| <b>0</b>    | 1.81 | 0.26 | -1.24 | 1.81 | 0.26  | -1.24 |
| <b>0.1</b>  | 1.77 | 0.24 | -1.26 | 1.55 | 0.15  | -1.31 |
| <b>0.2</b>  | 1.73 | 0.22 | -1.27 | 1.36 | 0.05  | -1.37 |
| <b>0.3</b>  | 1.69 | 0.20 | -1.29 | 1.16 | -0.07 | -1.43 |
| <b>0.4</b>  | 1.65 | 0.18 | -1.30 | 0.95 | -0.18 | -1.48 |

Table S 4 The segregation energy (eV) of Pt<sub>2</sub>Cu<sub>2</sub>/ Pt<sub>2</sub>Cu<sub>2</sub>/Pt(111) alloy under electric field with or without aqueous solution effect

| Electric field(V/Å) | Vacuum |                               | Aqueous solution |                               |
|---------------------|--------|-------------------------------|------------------|-------------------------------|
|                     | O atom | PO <sub>4</sub> <sup>3-</sup> | O atom           | PO <sub>4</sub> <sup>3-</sup> |
| <b>-0.4</b>         | 0.15   | -0.27                         | 0.11             | -0.57                         |
| <b>-0.3</b>         | 0.15   | -0.33                         | 0.13             | -0.21                         |
| <b>-0.2</b>         | 0.15   | -0.43                         | 0.14             | -0.35                         |
| <b>-0.1</b>         | 0.15   | -0.53                         | 0.14             | -0.47                         |
| <b>0</b>            | 0.15   | -0.62                         | 0.13             | -0.58                         |
| <b>0.1</b>          | 0.14   | -0.71                         | 0.11             | -0.65                         |
| <b>0.2</b>          | 0.14   | -0.78                         | 0.09             | -0.70                         |
| <b>0.3</b>          | 0.14   | -0.84                         | 0.07             | -0.74                         |
| <b>0.4</b>          | 0.13   | -0.91                         | 0.03             | -0.77                         |

Table S 5 The shell-layer d band center (eV) of PM alloy under electric field with or without aqueous solution effect

(a) Pt<sub>ML</sub>/Cu<sub>ML</sub>/Pt(111), Pt<sub>2</sub>Cu<sub>2</sub>/ Pt<sub>2</sub>Cu<sub>2</sub>/Pt(111) and Cu<sub>ML</sub>/Pt(111) alloy with and without aqueous solution

| Electric field(V/Å) | Vacuum           |                                 |                  | Aqueous solution |                                 |                  |
|---------------------|------------------|---------------------------------|------------------|------------------|---------------------------------|------------------|
|                     | Pt <sub>ML</sub> | Pt <sub>2</sub> Cu <sub>2</sub> | Cu <sub>ML</sub> | Pt <sub>ML</sub> | Pt <sub>2</sub> Cu <sub>2</sub> | Cu <sub>ML</sub> |
| <b>-0.4</b>         | -2.45            | -2.13                           | -2.09            | -2.50            | -2.16                           | -2.12            |
| <b>-0.3</b>         | -2.45            | -2.13                           | -2.08            | -2.48            | -2.15                           | -2.11            |
| <b>-0.2</b>         | -2.44            | -2.13                           | -2.08            | -2.47            | -2.14                           | -2.09            |
| <b>-0.1</b>         | -2.44            | -2.12                           | -2.07            | -2.45            | -2.13                           | -2.07            |
| <b>0.0</b>          | -2.43            | -2.12                           | -2.07            | -2.43            | -2.11                           | -2.05            |
| <b>0.1</b>          | -2.42            | -2.11                           | -2.06            | -2.41            | -2.09                           | -2.02            |
| <b>0.2</b>          | -2.42            | -2.11                           | -2.06            | -2.39            | -2.07                           | -1.99            |
| <b>0.3</b>          | -2.41            | -2.11                           | -2.05            | -2.37            | -2.05                           | -1.96            |
| <b>0.4</b>          | -2.41            | -2.10                           | -2.05            | -2.36            | -2.03                           | -1.93            |

(b) Pt<sub>ML</sub>/Pd<sub>ML</sub>/Pt(111), Pt<sub>2</sub>Pd<sub>2</sub>/ Pt<sub>2</sub>Pd<sub>2</sub>/Pt(111) and Pd<sub>ML</sub>/Pt(111) alloy with and without aqueous solution

| Electric field(V/Å) | Vacuum           |                                 |                  | Aqueous solution |                                 |                  |
|---------------------|------------------|---------------------------------|------------------|------------------|---------------------------------|------------------|
|                     | Pt <sub>ML</sub> | Pt <sub>2</sub> Pd <sub>2</sub> | Pd <sub>ML</sub> | Pt <sub>ML</sub> | Pt <sub>2</sub> Pd <sub>2</sub> | Pd <sub>ML</sub> |
| -0.4                | -2.41            | -2.23                           | -2.03            | -2.44            | -2.25                           | -2.05            |
| -0.3                | -2.41            | -2.23                           | -2.03            | -2.43            | -2.25                           | -2.05            |
| -0.2                | -2.41            | -2.23                           | -2.03            | -2.43            | -2.24                           | -2.04            |
| -0.1                | -2.40            | -2.23                           | -2.03            | -2.41            | -2.24                           | -2.03            |
| 0.0                 | -2.40            | -2.23                           | -2.02            | -2.40            | -2.22                           | -2.02            |
| 0.1                 | -2.40            | -2.22                           | -2.02            | -2.39            | -2.22                           | -2.01            |
| 0.2                 | -2.40            | -2.22                           | -2.02            | -2.38            | -2.21                           | -2.00            |
| 0.3                 | -2.39            | -2.22                           | -2.02            | -2.37            | -2.20                           | -1.99            |
| 0.4                 | -2.39            | -2.22                           | -2.01            | -2.37            | -2.19                           | -1.98            |

(c) Pt<sub>ML</sub>/Au<sub>ML</sub>/Pt(111), Pt<sub>2</sub>Au<sub>2</sub>/Pt<sub>2</sub>Au<sub>2</sub>/Pt(111) and Au<sub>ML</sub>/Pt(111) alloy with and without aqueous solution

| Electric field(V/Å) | Vacuum           |                                 |                  | Aqueous solution |                                 |                  |
|---------------------|------------------|---------------------------------|------------------|------------------|---------------------------------|------------------|
|                     | Pt <sub>ML</sub> | Pt <sub>2</sub> Au <sub>2</sub> | Au <sub>ML</sub> | Pt <sub>ML</sub> | Pt <sub>2</sub> Au <sub>2</sub> | Au <sub>ML</sub> |
| -0.4                | -2.24            | -2.84                           | -3.48            | -2.28            | -2.88                           | -3.57            |
| -0.3                | -2.23            | -2.83                           | -3.47            | -2.27            | -2.87                           | -3.54            |
| -0.2                | -2.23            | -2.83                           | -3.47            | -2.26            | -2.86                           | -3.51            |
| -0.1                | -2.23            | -2.82                           | -3.46            | -2.24            | -2.83                           | -3.47            |
| 0.0                 | -2.22            | -2.81                           | -3.45            | -2.22            | -2.81                           | -3.44            |
| 0.1                 | -2.22            | -2.81                           | -3.44            | -2.21            | -2.79                           | -3.43            |
| 0.2                 | -2.21            | -2.80                           | -3.43            | -2.20            | -2.77                           | -3.40            |
| 0.3                 | -2.21            | -2.79                           | -3.43            | -2.19            | -2.74                           | -3.36            |
| 0.4                 | -2.21            | -2.79                           | -3.42            | -2.18            | -2.71                           | -3.33            |

Table S 6 The surface energy (eV/Å<sup>2</sup>) of PM alloy under electric field with or without aqueous solution effect

(a) Pt<sub>ML</sub>/Cu<sub>ML</sub>/Pt(111), Pt<sub>ML</sub>/Pd<sub>ML</sub>/Pt(111) and Pt<sub>ML</sub>/Au<sub>ML</sub>/Pt(111) alloy with and without aqueous solution

| Electric field(V/Å) | Vacuum               |                      |                      | Aqueous solution     |                      |                      |
|---------------------|----------------------|----------------------|----------------------|----------------------|----------------------|----------------------|
|                     | Pt <sub>ML</sub> -Cu | Pt <sub>ML</sub> -Pd | Pt <sub>ML</sub> -Au | Pt <sub>ML</sub> -Cu | Pt <sub>ML</sub> -Pd | Pt <sub>ML</sub> -Au |
| -0.4                | 0.05                 | 0.08                 | 0.09                 | 0.03                 | 0.06                 | 0.07                 |
| -0.3                | 0.05                 | 0.08                 | 0.09                 | 0.04                 | 0.07                 | 0.08                 |
| -0.2                | 0.05                 | 0.08                 | 0.09                 | 0.05                 | 0.08                 | 0.09                 |
| -0.1                | 0.05                 | 0.08                 | 0.10                 | 0.05                 | 0.08                 | 0.09                 |
| 0                   | 0.05                 | 0.08                 | 0.10                 | 0.05                 | 0.08                 | 0.10                 |
| 0.1                 | 0.05                 | 0.08                 | 0.10                 | 0.05                 | 0.08                 | 0.09                 |
| 0.2                 | 0.05                 | 0.08                 | 0.09                 | 0.04                 | 0.08                 | 0.09                 |
| 0.3                 | 0.05                 | 0.08                 | 0.09                 | 0.04                 | 0.07                 | 0.08                 |
| 0.4                 | 0.04                 | 0.08                 | 0.09                 | 0.03                 | 0.06                 | 0.08                 |

(b) Pt<sub>2</sub>Cu<sub>2</sub>/Pt<sub>2</sub>Cu<sub>2</sub>/Pt(111), Pt<sub>2</sub>Pd<sub>2</sub>/Pt<sub>2</sub>Pd<sub>2</sub>/Pt(111) and Pt<sub>2</sub>Au<sub>2</sub>/Pt<sub>2</sub>Au<sub>2</sub>/Pt(111) alloy with and without



## aqueous solution

| Electric field(V/Å) | Vacuum                          |                                 |                                 | Aqueous solution                |                                 |                                 |
|---------------------|---------------------------------|---------------------------------|---------------------------------|---------------------------------|---------------------------------|---------------------------------|
|                     | Pt <sub>2</sub> Cu <sub>2</sub> | Pt <sub>2</sub> Pd <sub>2</sub> | Pt <sub>2</sub> Au <sub>2</sub> | Pt <sub>2</sub> Cu <sub>2</sub> | Pt <sub>2</sub> Pd <sub>2</sub> | Pt <sub>2</sub> Au <sub>2</sub> |
| <b>-0.4</b>         | 0.06                            | 0.08                            | 0.08                            | 0.05                            | 0.07                            | 0.07                            |
| <b>-0.3</b>         | 0.06                            | 0.08                            | 0.09                            | 0.06                            | 0.08                            | 0.08                            |
| <b>-0.2</b>         | 0.07                            | 0.08                            | 0.09                            | 0.06                            | 0.08                            | 0.08                            |
| <b>-0.1</b>         | 0.07                            | 0.09                            | 0.09                            | 0.07                            | 0.09                            | 0.09                            |
| <b>0</b>            | 0.07                            | 0.09                            | 0.09                            | 0.07                            | 0.09                            | 0.09                            |
| <b>0.1</b>          | 0.07                            | 0.09                            | 0.09                            | 0.06                            | 0.08                            | 0.09                            |
| <b>0.2</b>          | 0.06                            | 0.08                            | 0.09                            | 0.06                            | 0.08                            | 0.08                            |
| <b>0.3</b>          | 0.06                            | 0.08                            | 0.09                            | 0.05                            | 0.07                            | 0.08                            |
| <b>0.4</b>          | 0.06                            | 0.08                            | 0.08                            | 0.04                            | 0.06                            | 0.07                            |

(c) Cu<sub>ML</sub>/Pt(111), Pd<sub>ML</sub>/Pt(111) and Au<sub>ML</sub>/Pt(111) alloy with and without aqueous solution

| Electric field(V/Å) | Vacuum           |                  |                  | Aqueous solution |                  |                  |
|---------------------|------------------|------------------|------------------|------------------|------------------|------------------|
|                     | Cu <sub>ML</sub> | Pd <sub>ML</sub> | Au <sub>ML</sub> | Cu <sub>ML</sub> | Pd <sub>ML</sub> | Au <sub>ML</sub> |
| <b>-0.4</b>         | 0.08             | 0.08             | 0.07             | 0.07             | 0.07             | 0.06             |
| <b>-0.3</b>         | 0.08             | 0.09             | 0.07             | 0.08             | 0.08             | 0.06             |
| <b>-0.2</b>         | 0.08             | 0.09             | 0.07             | 0.08             | 0.08             | 0.07             |
| <b>-0.1</b>         | 0.08             | 0.09             | 0.07             | 0.08             | 0.09             | 0.07             |
| <b>0</b>            | 0.08             | 0.09             | 0.07             | 0.08             | 0.09             | 0.07             |
| <b>0.1</b>          | 0.08             | 0.09             | 0.07             | 0.08             | 0.08             | 0.07             |
| <b>0.2</b>          | 0.08             | 0.09             | 0.07             | 0.07             | 0.08             | 0.07             |
| <b>0.3</b>          | 0.08             | 0.08             | 0.07             | 0.06             | 0.07             | 0.06             |
| <b>0.4</b>          | 0.07             | 0.08             | 0.07             | 0.05             | 0.06             | 0.05             |
